# Supplementary material for: 1,8-Naphthyridine-based molecular clips for off–on fluorescence sensing of Zn2+ in living cells
Source: Royal Society of Chemistry journal article supplement (doi:10.1039/c5ra08513f), 2015-01-01

Supporting Informations for

**1,8-Naphthyridine-based molecular clips for off-on fluorescence sensing  
of Zn<sup>2+</sup> in living cells**

De-Hui Wang,<sup>‡a\*</sup> Yuan Zhang,<sup>‡b\*</sup> Zhe Gong,<sup>a</sup> Ran Sun,<sup>a</sup> De-Zhi Zhao<sup>a</sup> and Chang-Liang Sun<sup>\*c</sup>

<sup>a</sup> College of Chemistry, Chemical Engineering and Environmental Engineering,

Liaoning Shihua University, Fushun, 113001, China

<sup>b</sup> Liaoning Institute for Food Control, Shenyang, 110015, China.

<sup>c</sup> Center of Physical Chemistry Test, Shenyang University of Chemical Technology,

Shenyang 110142, China.

\*Corresponding author: E-mail: [dhuiwang@aliyun.com](mailto:dhuiwang@aliyun.com).

<sup>‡</sup>D. Wang and Y. Zhang contributed equally to this work.

---

## Contents

### 1. Experimental Section.

Reagents and instruments

General procedures of spectra detection

NMR titration method

Cell incubation and imaging

Computational details

Method of ESI-MS spectra for **DP1**+Zn

Synthesis of **DP1** and **DP2**

**Scheme S1** Synthetic procedure of TIA1 and TIA2

**2. Figure S1** Absorption spectra of **DP1** upon addition of increasing amounts of Zn(ClO<sub>4</sub>)<sub>2</sub>.

**3. Figure S2** Binding analysis using the method of Job's plot

**4. Figure S3** ESI-MS spectra of **DP1** in the presence of Zn<sup>2+</sup>

**5. Figure S4** The pH-dependent fluorescence response of **DP1** and **DP1**+Zn<sup>2+</sup>

**6. Figure S5** Optimized geometry of **DP1**-Zn<sup>2+</sup>

**7. Figure S6** Frontier orbitals of **DP1** and **DP1**-Zn<sup>2+</sup>

**8. Figure S7** <sup>1</sup>H-NMR and <sup>13</sup>C-NMR spectra of **DP1**.

**9. Figure S8** <sup>1</sup>H-NMR and <sup>13</sup>C-NMR spectra of **DP2**.

**10. Figure S9** <sup>1</sup>H-NMR spectra of **1**.

**11. Figure S10** <sup>1</sup>H-NMR spectra of **2**.

**12. Figure S11** <sup>1</sup>H-NMR spectra of **NAPY**.

**13. Figure S12** MS spectra of **DP1**.

**14. Figure S13** MS spectra of **DP2**

**15. Figure S14** Calculations for detection limit of **DP1** with Zn<sup>2+</sup>.

**16. Figure S15** UV-Vis spectral data of **DP2**

---

## 1. Experimental Section

### Reagents and instruments

All reagents and solvents were of AR grade and used without further purification unless otherwise noted. All solvents were dried using standard procedure prior to use.

$^1\text{H}$  NMR and  $^{13}\text{C}$  NMR spectra were recorded on a VARIAN INOVA-400 spectrometer with chemical shifts reported as ppm (in  $\text{DMSO-}d_6$  or  $\text{CDCl}_3$ , TMS as internal standard). Mass spectrometric data were obtained on HP1100LC/MSD and LCQ-Tofmass spectrometers. Fluorescence emission spectra were obtained using EDINBURGH FS920 luminescence spectrometer. For all fluorescent measurements, both excitation and emission slit widths were 1 nm. Optical absorption spectra were measured on a TU-1900 Uv/Vis spectrophotometer at room temperature. Cell imaging were measured on Nikon eclipse TE2000-5 inverted fluorescence microscopy.

### General procedures of spectra detection

Stock solutions ( $2 \times 10^{-2}$  M) of the  $\text{CH}_3\text{CN}$  perchlorate salts of  $\text{K}^+$ ,  $\text{Na}^+$ ,  $\text{Ca}^{2+}$ ,  $\text{Mg}^{2+}$ ,  $\text{Co}^{2+}$ ,  $\text{Ni}^{2+}$ ,  $\text{Cu}^{2+}$ ,  $\text{Mn}^{2+}$ ,  $\text{Zn}^{2+}$ ,  $\text{Cd}^{2+}$ ,  $\text{Fe}^{3+}$ ,  $\text{Ag}^+$ ,  $\text{Pb}^{2+}$  and  $\text{Hg}^{2+}$  were prepared and diluted to the appropriate concentration. Stock solution of **DP1** and **DP2** (1 mM) were also prepared in distilled  $\text{CH}_3\text{CN}$  solution. Test solutions were prepared by placing 40  $\mu\text{L}$  of host stock solution into a quartz cell of 1 cm optical path length including 2 mL  $\text{CH}_3\text{CN}:\text{H}_2\text{O}$  (1:1, v/v, containing 0.01 M HEPES, pH=7.21) solution, and then adding an appropriate aliquot of each metals stock by using a micro-syringe. The fluorescence quantum yield was determined using optically matching solutions of Rhodamine-6G ( $\Phi_f = 0.94$  in ethanol) as the standard at an excitation wavelength of 500 nm. Excitation and emission slit widths were modified to adjust the luminescent intensity in a suitable range. All the spectroscopic measurements were performed at least in triplicate and averaged.

---

## **NMR titration method**

All NMR spectra were measured on a VARIAN INOVA-400 spectrometer at 298 K. A solution (1 mM) of receptor **DP1** in DMSO-*d*<sub>6</sub> was titrated with sufficient quantum of Zn(ClO<sub>4</sub>)<sub>2</sub> by using a micro-syringe. The chemical shift changes of the proton of **DP1** were monitored.

## **Cell incubation and imaging**

HeLa cells were cultured in 1640 supplemented with 10% FCS (Invitrogen). Cells were seeded in 24-well flat-bottomed plates for Nikon eclipse TE2000-5 inverted fluorescence microscopy. After 12 h, HeLa cells were incubated with 5 μM compound **DP1** (in the culture medium containing 0.5% DMSO) for 15 min at 37 °C under 5% CO<sub>2</sub> and then washed with phosphate-buffered saline (PBS) three times before incubating with 20 eq Zn<sup>2+</sup> for another 30 min, and cells were rinsed with PBS three times again. The fluorescence imaging of intracellular Zn<sup>2+</sup> in HeLa cells was observed under Nikon eclipse TE2000-5 inverted fluorescence microscopy with a 20×objective lens (excited with blue light). For all images, the microscope settings, such as brightness, contrast, and exposure time were held constant to compare the relative intensity of intracellular Zn<sup>2+</sup> fluorescence.

## **Computational details**

Frontier molecular orbitals have been performed at the Becke3LYP (B3LYP) level of the density functional theory. The SDD basis set is used to describe Zn and 6-31G(d) basis set was used for all the other atoms.

## **Method of ESI-MS spectra for DP1+Zn<sup>2+</sup>**

The reaction mixtures of Zn(II) perchlorate and **DP1** in a 10:1 molar ratio in 30 mL mixed solvents of dichloromethane and methanol were stirred at room temperature for 5 hours, then filtered and concentrated to 5 mL. Addition of diethyl ether gave yellow solids. The crude products were redissolved in dichloromethane for the ESI-MS spectra.

## Synthesis of DP1 and DP2

The synthetic scheme for the preparation of the **DP1** and **DP2** are shown in Scheme S1.

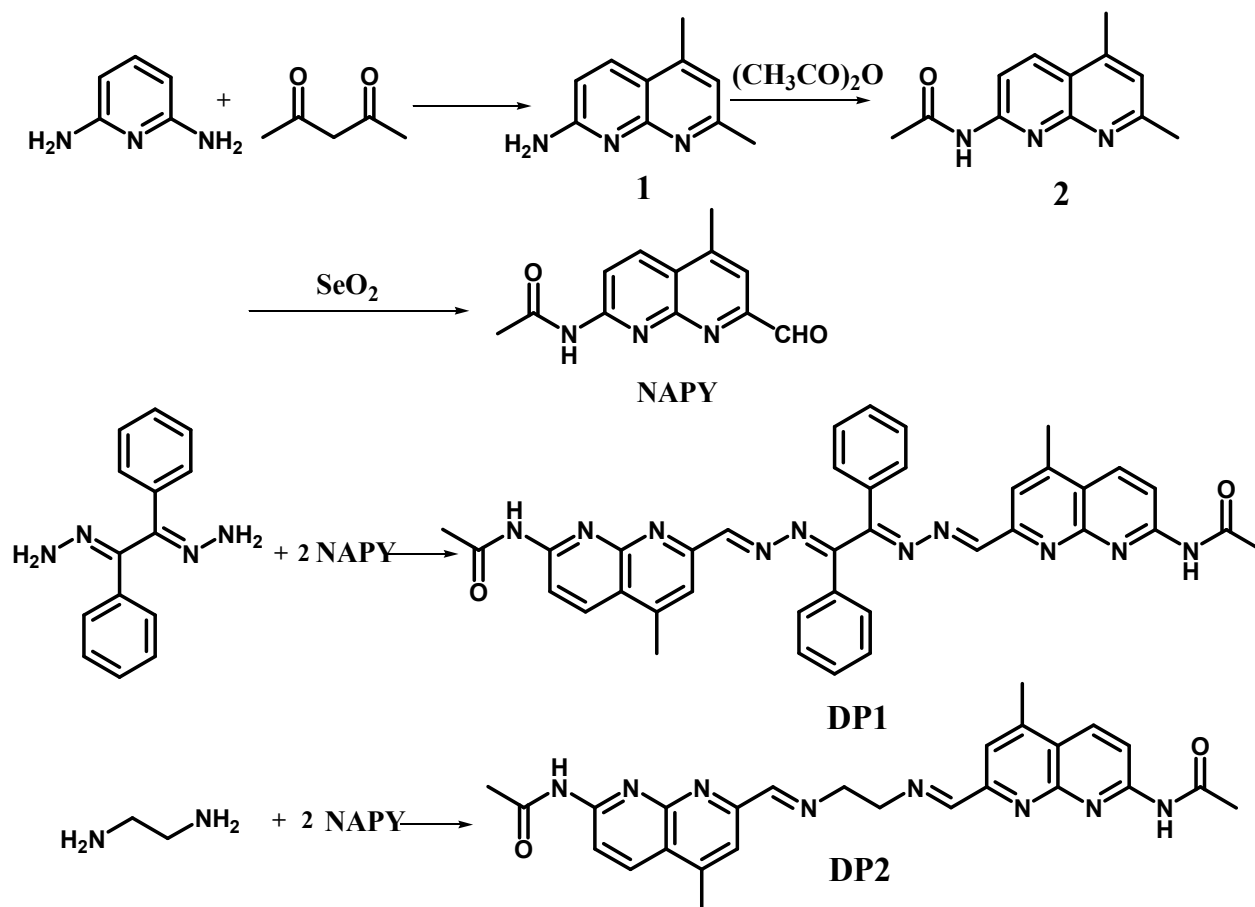

**Scheme S1.** The synthetic procedure of **DP1** and **DP2**

### Synthesis of 7-Amino-2,4-dimethyl-1,8-naphthyridine (**1**)

**1** was synthesized and purified following the literature procedures described previously.<sup>1</sup>  $^1\text{H}$  NMR (400 MHz,  $\text{CDCl}_3$ )  $\delta$ : 7.99 (d,  $1\text{H}_{\text{Ar}}$ ,  $J = 8\text{Hz}$ ), 6.92 (s,  $1\text{H}_{\text{Ar}}$ ), 6.73 (d,  $1\text{H}_{\text{Ar}}$ ,  $J = 8\text{Hz}$ ), 5.82 (d,  $2\text{H}_{\text{NH}_2}$ ,  $J = 6.4\text{Hz}$ ), 2.83 (s,  $3\text{H}_{\text{CH}_3}$ ), 2.54 (s,  $3\text{H}_{\text{CH}_3}$ ).

### Synthesis of 7-acetylamino-2,4-dimethyl-1,8-naphthyridine (**2**)

---

**2** was synthesized and purified following the literature procedures described previously.<sup>2</sup> <sup>1</sup>H NMR (400 MHz, CDCl<sub>3</sub>) δ: 9.26 (s, 1H<sub>NH</sub>), 8.47 (d, 1H<sub>Ar</sub>, *J* = 8Hz), 8.32 (d, 1H<sub>Ar</sub>, *J* = 8Hz), 7.12 (s, 1H<sub>Ar</sub>), 2.70 (s, 3H<sub>CH3</sub>), 2.65 (s, 3H<sub>CH3</sub>), 2.28 (s, 3H<sub>CH3</sub>).

#### Synthesis of **7-acetylamino-4-methyl-1,8-naphthyridine-2-aldehyde (NAPY)**

**NAPY** was synthesized and purified following the literature procedures described previously.<sup>3</sup> <sup>1</sup>H NMR (400 MHz, CDCl<sub>3</sub>) δ: 10.20 (s, 1H<sub>CHO</sub>), 9.07 (s, 1H<sub>NH</sub>), 8.68 (d, 1H<sub>Ar</sub>, *J* = 8Hz), 8.45 (d, 1H<sub>Ar</sub>, *J* = 8Hz), 7.87 (s, 1H<sub>Ar</sub>), 2.79 (s, 3H<sub>CH3</sub>), 2.32 (s, 3H<sub>CH3</sub>).

#### Synthesis of **DP1**

Benzyl dihydrazone (0.24g, 1 mmol) was added slowly with stirring to a solution of **NAPY** (0.458g, 2.0 mmol) in 50 mL of methanol. The resulting solution was refluxed for 12 h under a nitrogen atmosphere (Scheme S1). The pale yellow precipitate that formed was filtered, washed with methanol and dried under vacuum. Yield **DP1**: 86%.. Anal calc. for C<sub>38</sub>H<sub>32</sub>N<sub>10</sub>O<sub>2</sub>: C 69.08, H 4.88, N 21.20, O 4.84%. Found: C 69.10, H 4.90, N 21.17, O 4.83%; <sup>1</sup>H NMR (400 MHz, DMSO-*d*<sub>6</sub>) δ: 11.05 (s, 1H<sub>NH</sub>), 8.53 (d, 1H<sub>Ar</sub>, *J* = 8Hz), 8.48 (s, 2H<sub>Ar</sub>), 8.38 (d, 1H<sub>Ar</sub>, *J* = 8Hz), 7.55 (m, 5H<sub>Ar</sub>), 3.17 (s, 3H<sub>CH3</sub>), 2.15 (s, 3H<sub>CH3</sub>); <sup>13</sup>C NMR (400 MHz, DMSO-*d*<sub>6</sub>) δ: 164.91, 163.55, 163.38, 157.09, 147.52, 144.12, 136.16, 133.01, 131.90, 129.51, 128.59, 126.59, 122.14, 114.33, 114.14, 54.78, 26.12. MS: *m/z* 598.56 (M+Na)<sup>+</sup>.

#### Synthesis of **DP2**

**DP2** was synthesized in the same method as that of **DP1** as a pale yellow powder. Anal calc. for C<sub>26</sub>H<sub>26</sub>N<sub>8</sub>O<sub>2</sub>: C 64.72, H 5.43, N 23.22, O 6.63%. Found: C 64.65, H 5.42, N 23.28, O 6.65%; <sup>1</sup>H NMR (400 MHz, DMSO-*d*<sub>6</sub>) δ: 11.08 (s, 1H<sub>NH</sub>), 8.56 (d, 1H<sub>Ar</sub>, *J* = 8Hz), 8.46 (s, 1H<sub>Ar</sub>), 8.38 (d, 1H<sub>Ar</sub>, *J* = 8Hz), 7.90 (s, 1H<sub>CH</sub>), 4.11 (s, 2H<sub>CH2</sub>), 2.69 (s, 3H<sub>CH3</sub>), 2.17 (s, 3H<sub>CH3</sub>); <sup>13</sup>C NMR (100

---

MHz, DMSO- $d_6$ )  $\delta$ : 162.12, 161.87, 157.89, 152.08, 134.39, 131.63, 130.41, 128.88, 127.54, 109.52, 97.12, 45.17, 12.37. MS:  $m/z$  483.35 (M+H)<sup>+</sup>;  $m/z$  484.36 (M+2H)<sup>+</sup>.

1 Z. X. Li, W.F. Fu, M. M. Yu, X. J. Zhao, Y. Chen, *Dyes and Pigments*, 2007, 75, 516.

2 C. He, S.J. Lippard, *Tetrahedron*, 2000, 56, 8245 .

3 R.A. Henry, P.R. Hammond, *J. Heterocyclic Chem.*, 1977, 1109 .

2. **Figure S1** Top: Absorption spectra of **DP1** upon addition of increasing amounts of  $\text{Zn}(\text{ClO}_4)_2$  in  $\text{CH}_3\text{CN}:\text{H}_2\text{O}(1:1, \text{v/v})$ , containing 0.01 M HEPES,  $\text{pH}=7.21$ ). Bottom: The plot of  $\text{Zn}^{2+}$  concentration versus absorbance at 424 nm.

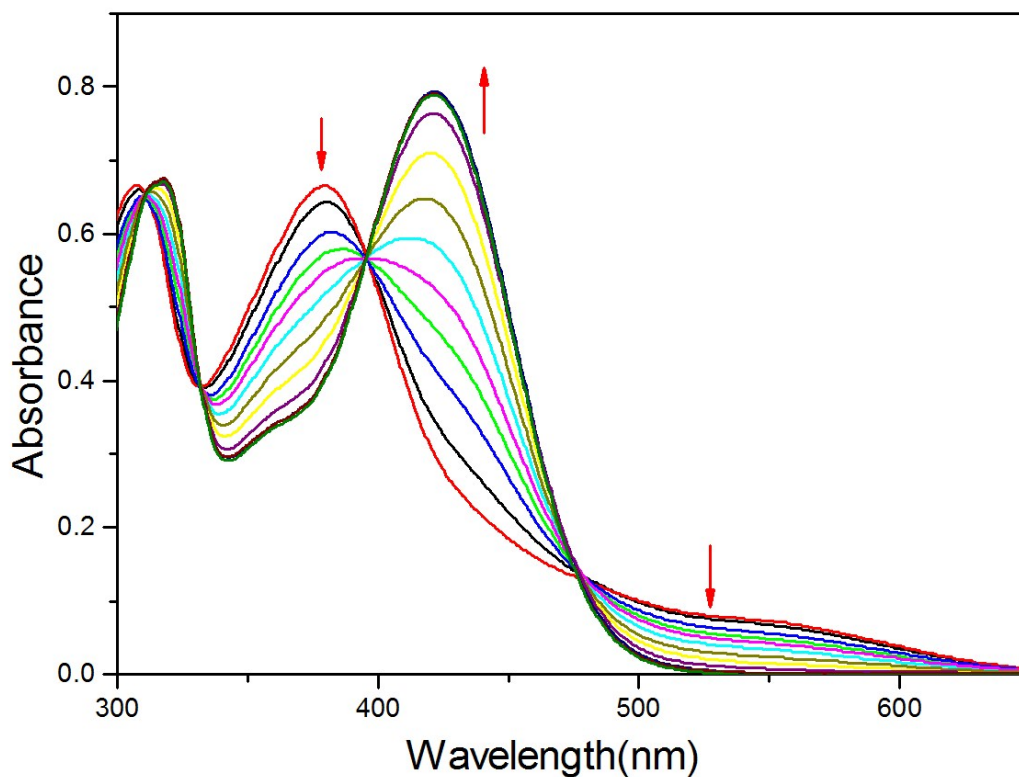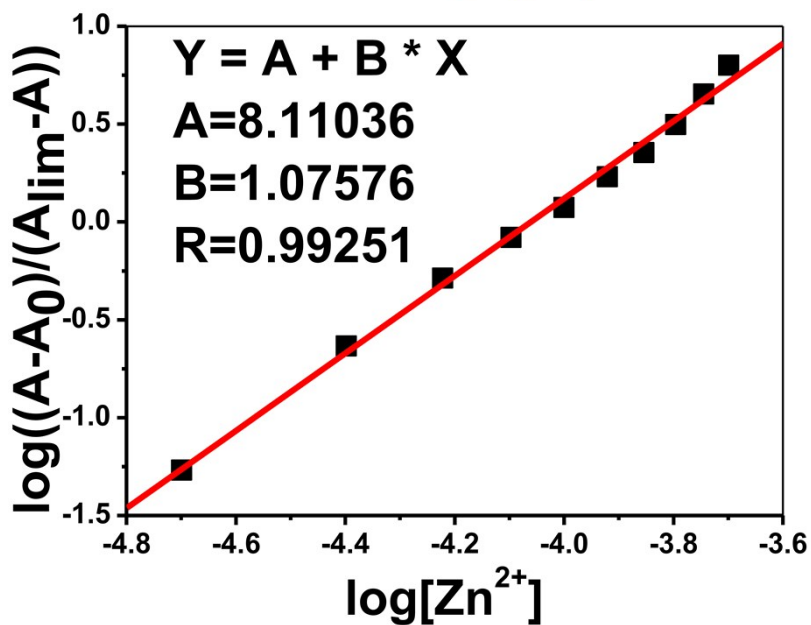



**3. Figure S2** Binding analysis using the method of Job's plot. Fluorescence intensity at 518 nm in CH<sub>3</sub>CN:H<sub>2</sub>O (1:1, v/v, containing 0.01 M HEPES, pH=7.21) of compound **DP1** varied upon addition of Zn(ClO<sub>4</sub>)<sub>2</sub> with an excitation at 424 nm.

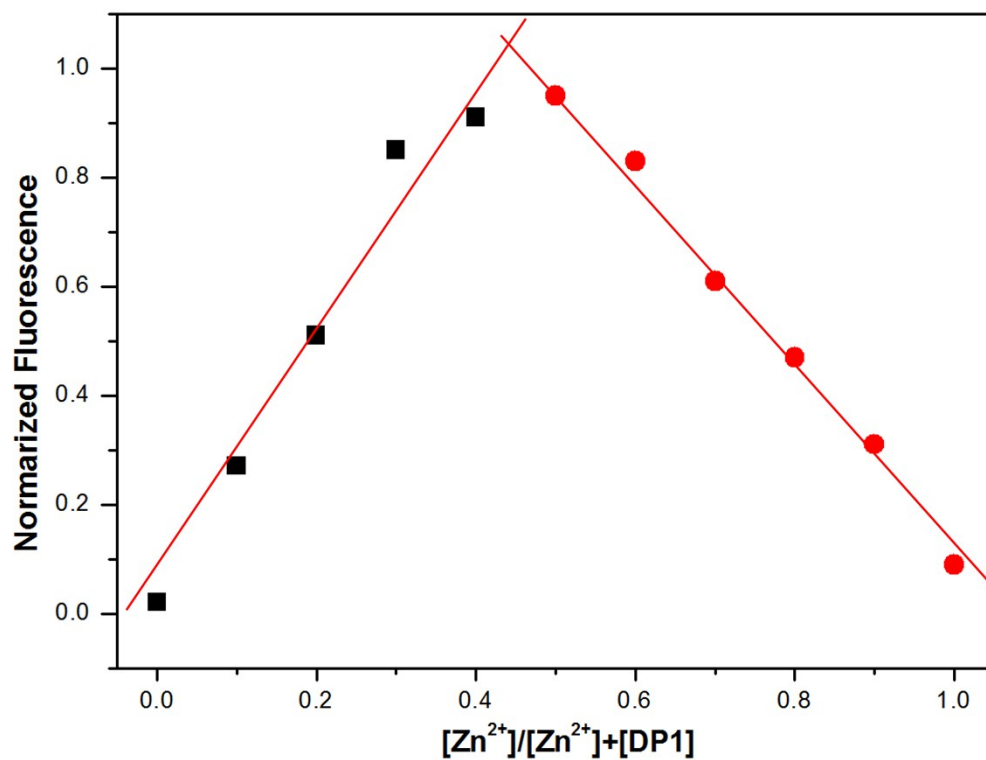

**4. Figure S3** ESI-MS spectra of **DP1** in the presence of  $\text{Zn}^{2+}$  exhibited two peaks at  $m/z = 362.28$  and  $823.56$ , assignable to  $[\text{DP1}+\text{Zn}]^{2+}$  and  $[\text{DP1}+\text{Zn}+\text{ClO}_4]^+$  complexation species, respectively. The high resolved spectra exhibit the measured (bottom pictures) and simulated (top ones) isotopic patterns at  $m/z 362.28$  and  $m/z 823.56$ , respectively.

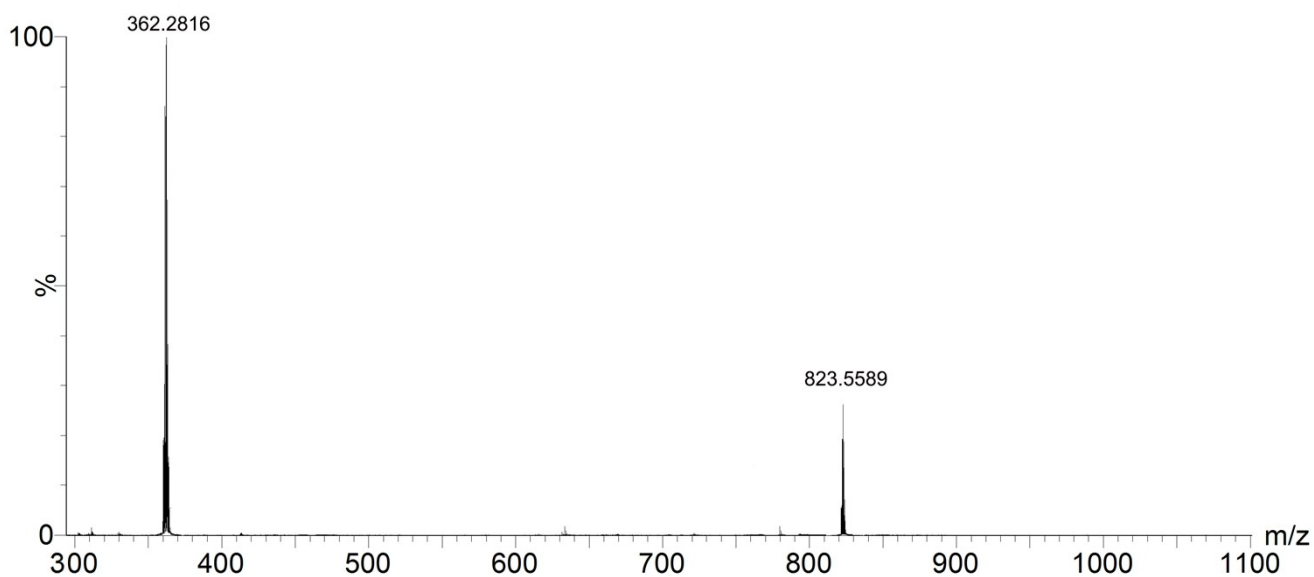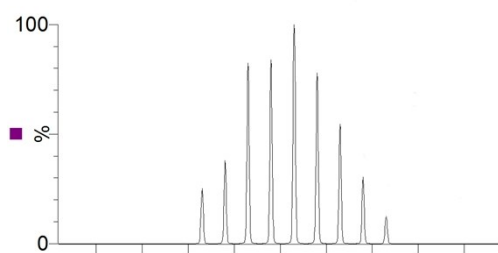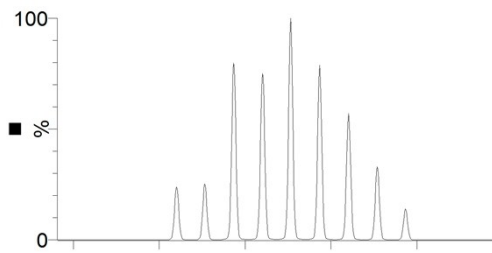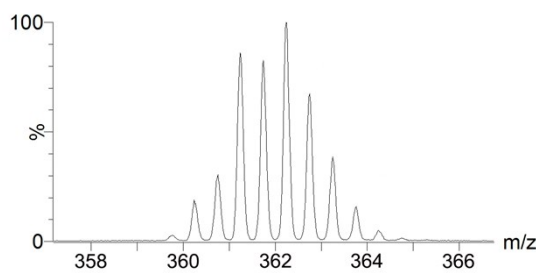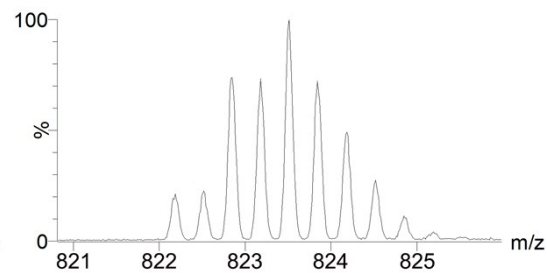

**5. Figure S4** The pH-dependent fluorescence response of **DP1** (20  $\mu\text{M}$ ) and **DP1+Zn<sup>2+</sup>** in  $\text{CH}_3\text{CN}/\text{H}_2\text{O}$  (1:1, v/v).

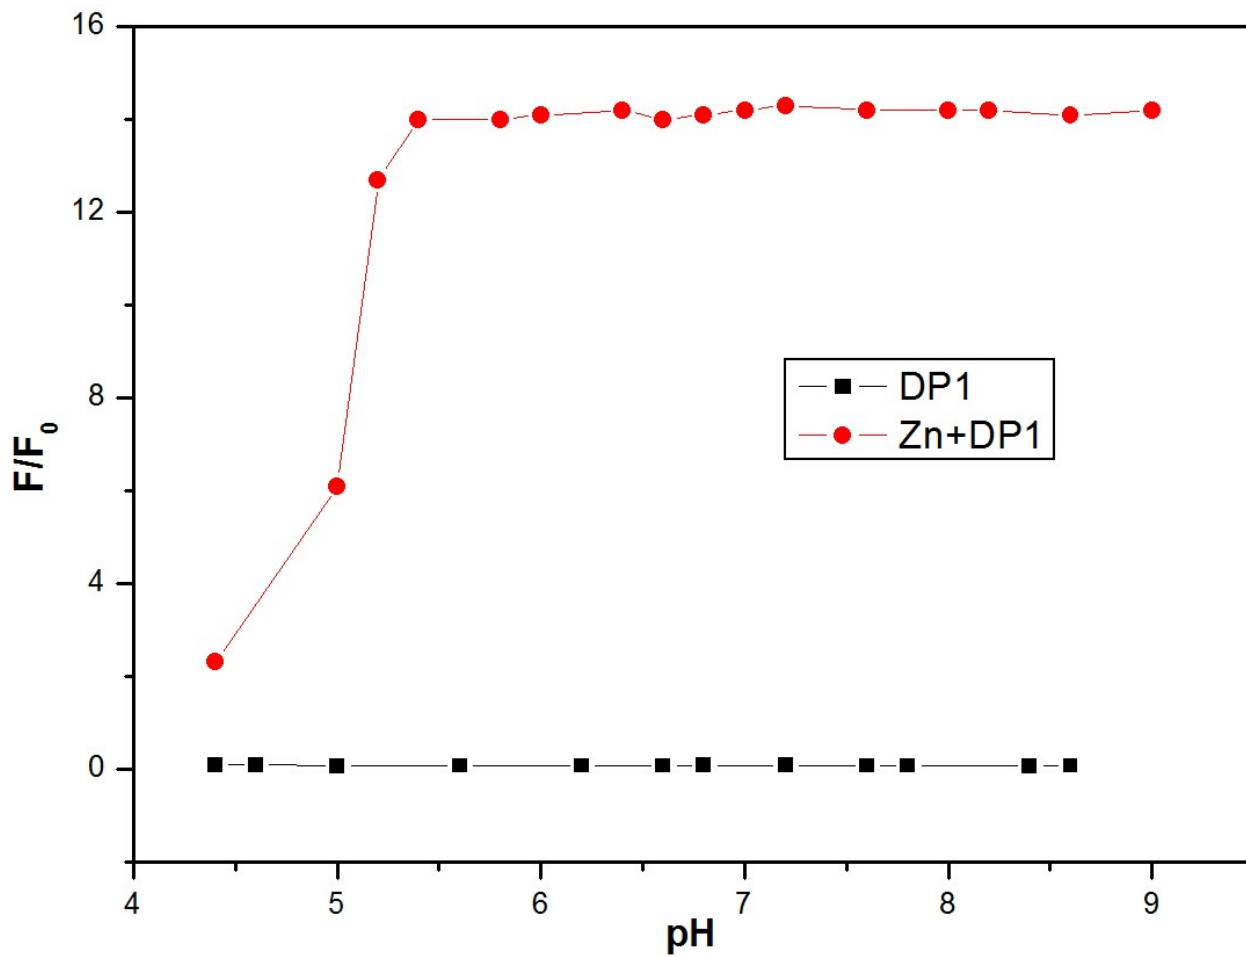

---

6. **Figure S5** Optimized geometry of **DP1** and **DP1-Zn<sup>2+</sup>**.

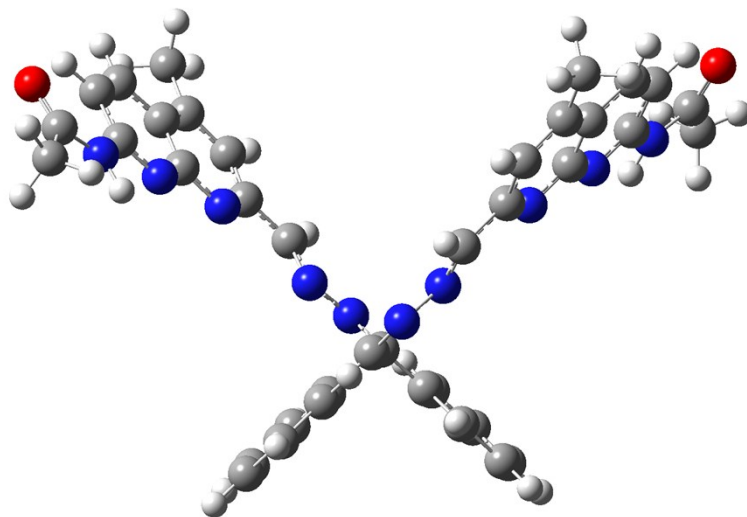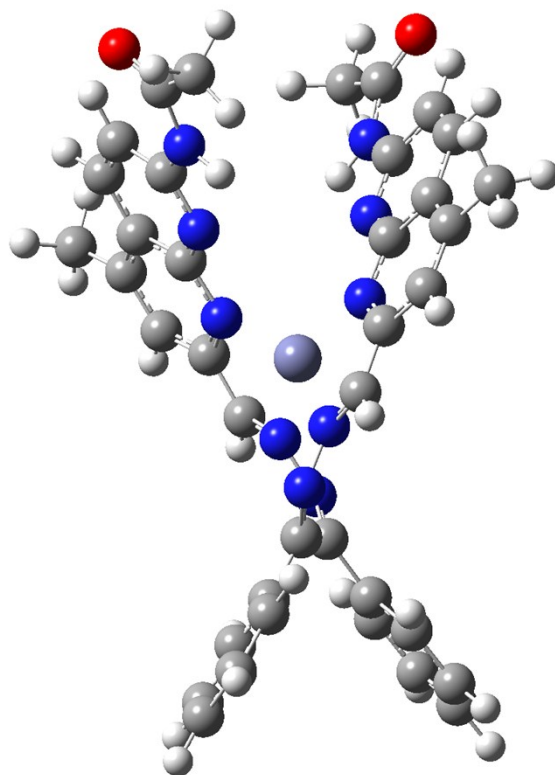

7. **Figure S6** Frontier orbitals of **DP1**(a) and **DP1-Zn<sup>2+</sup>** complexation species (b) based on their optimized geometries.

**a**

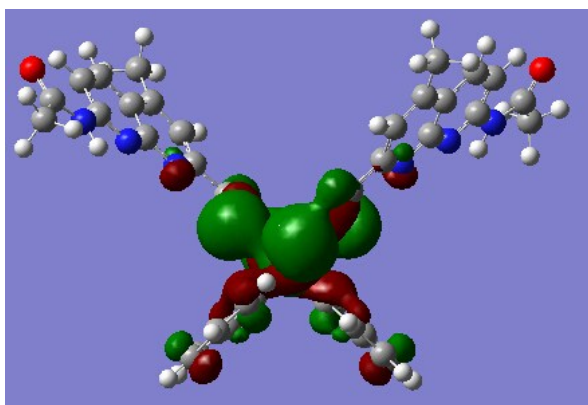

**HOMO**

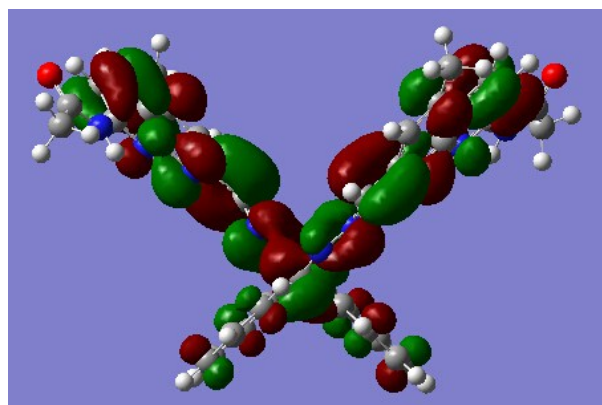

**LUMO**

**b**

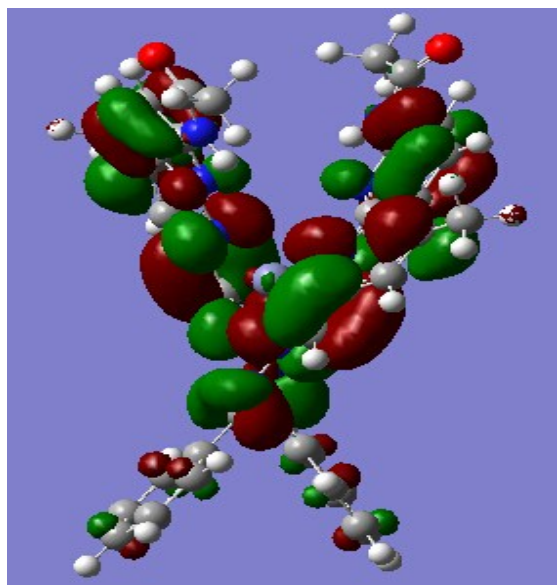

**HOMO**

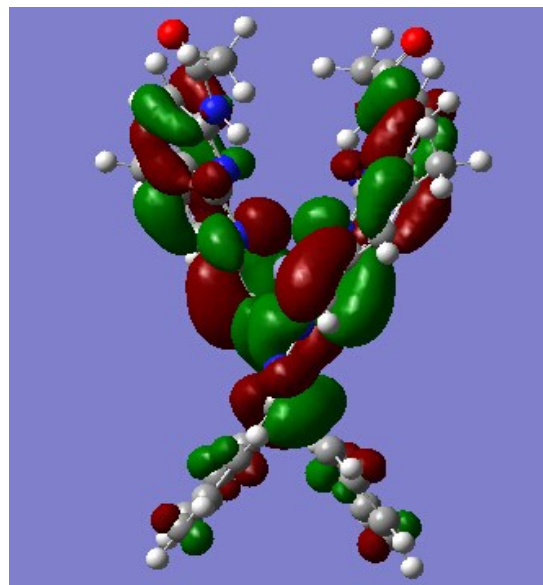

**LUMO**

## 8. Figure S7 $^1\text{H}$ -NMR and $^{13}\text{C}$ -NMR spectra of DP1.

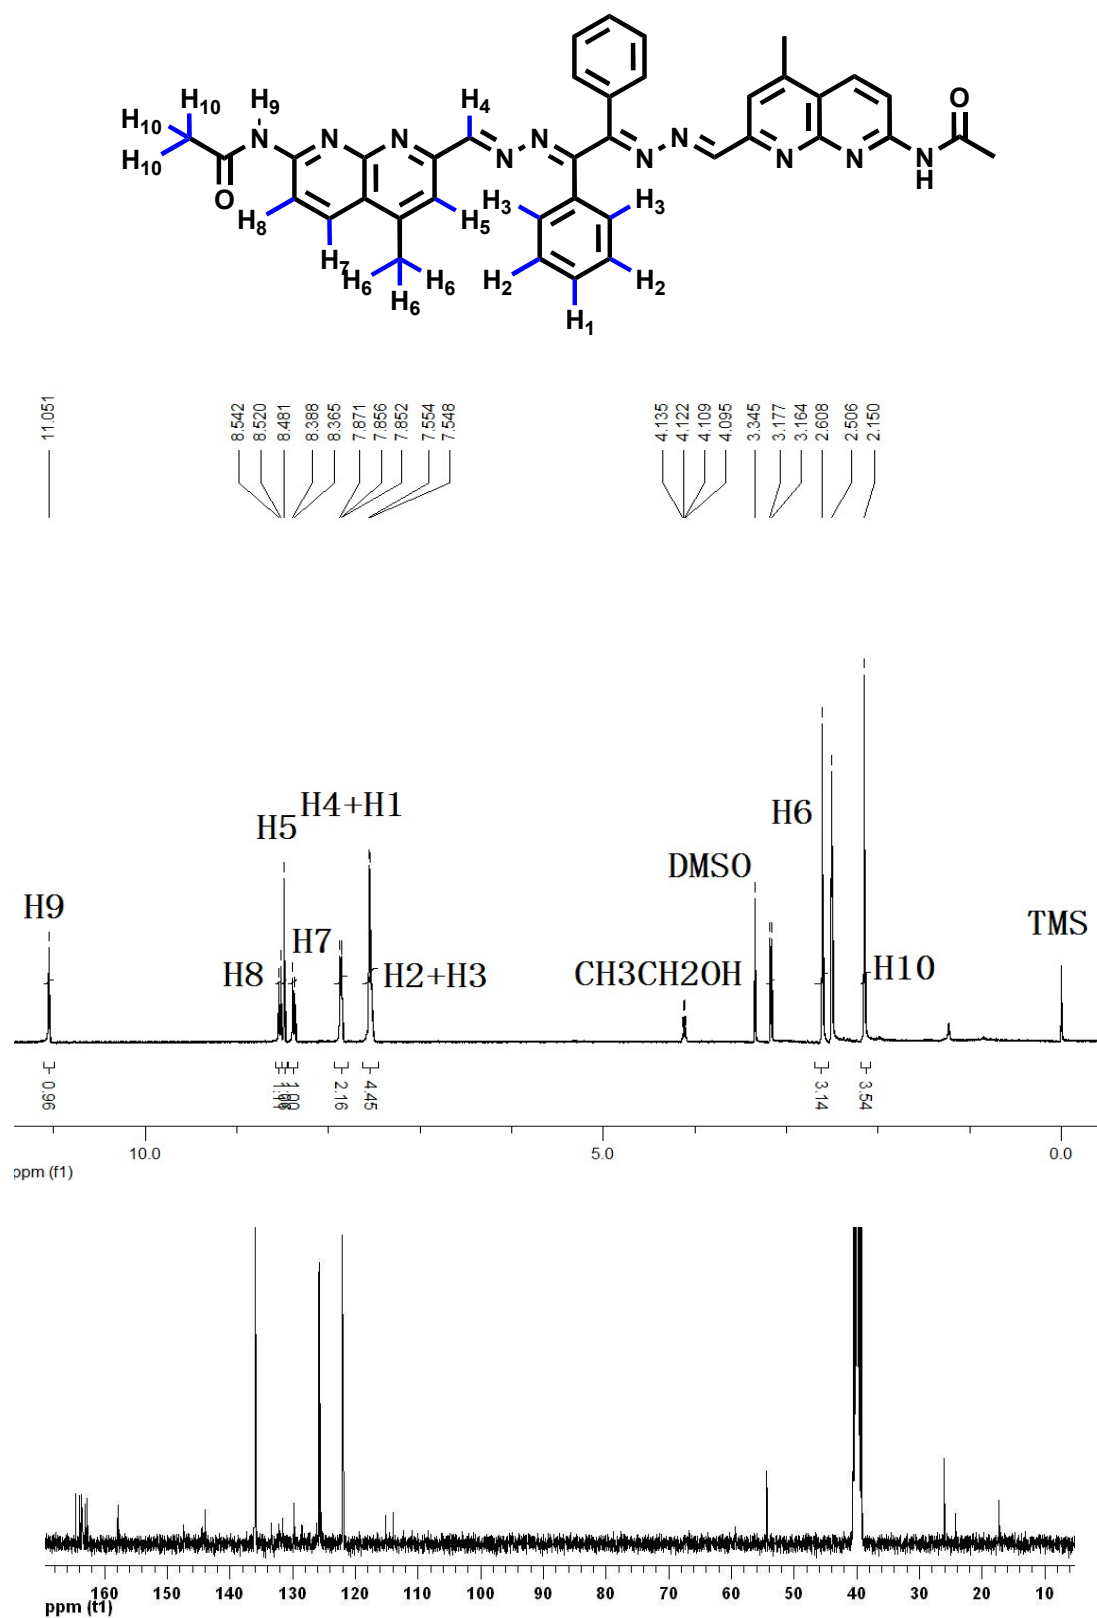

## 9. Figure S8 $^1\text{H}$ -NMR and $^{13}\text{C}$ -NMR spectra of DP2.

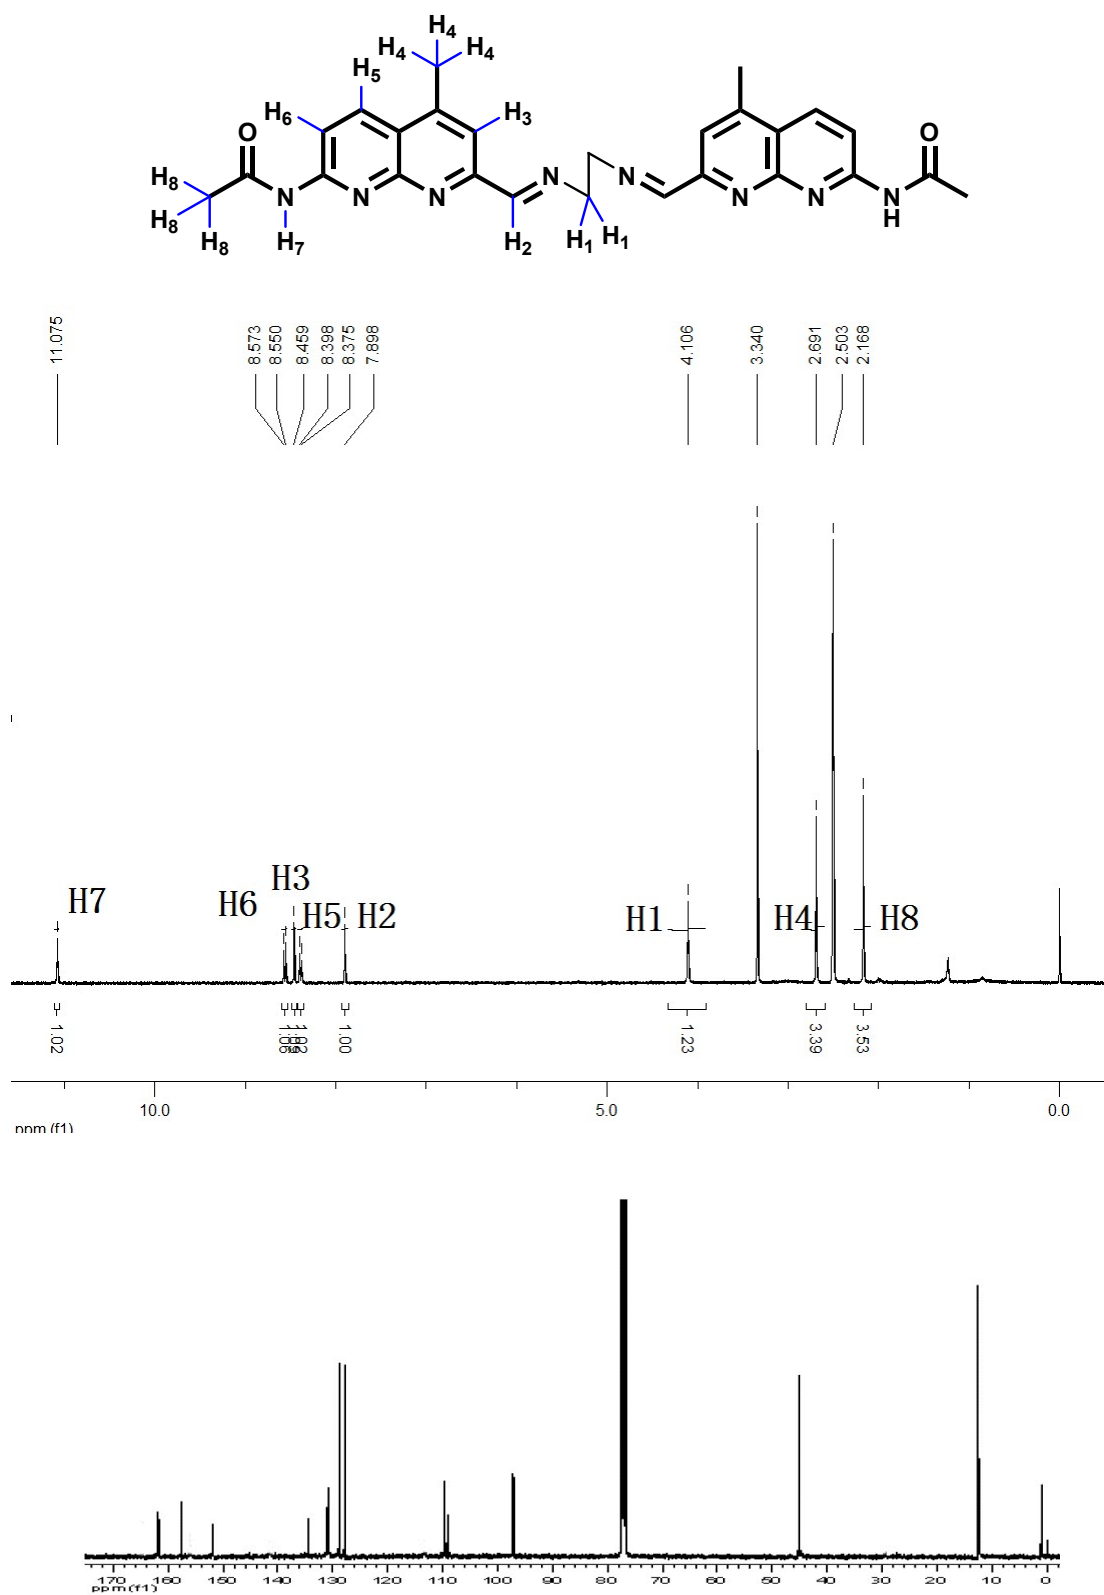

10. Figure S9 <sup>1</sup>H-NMR spectra of 1.

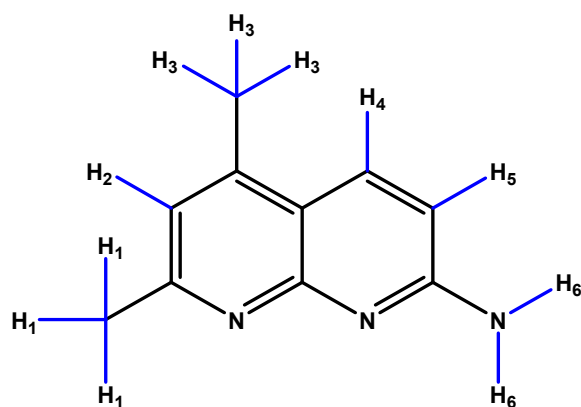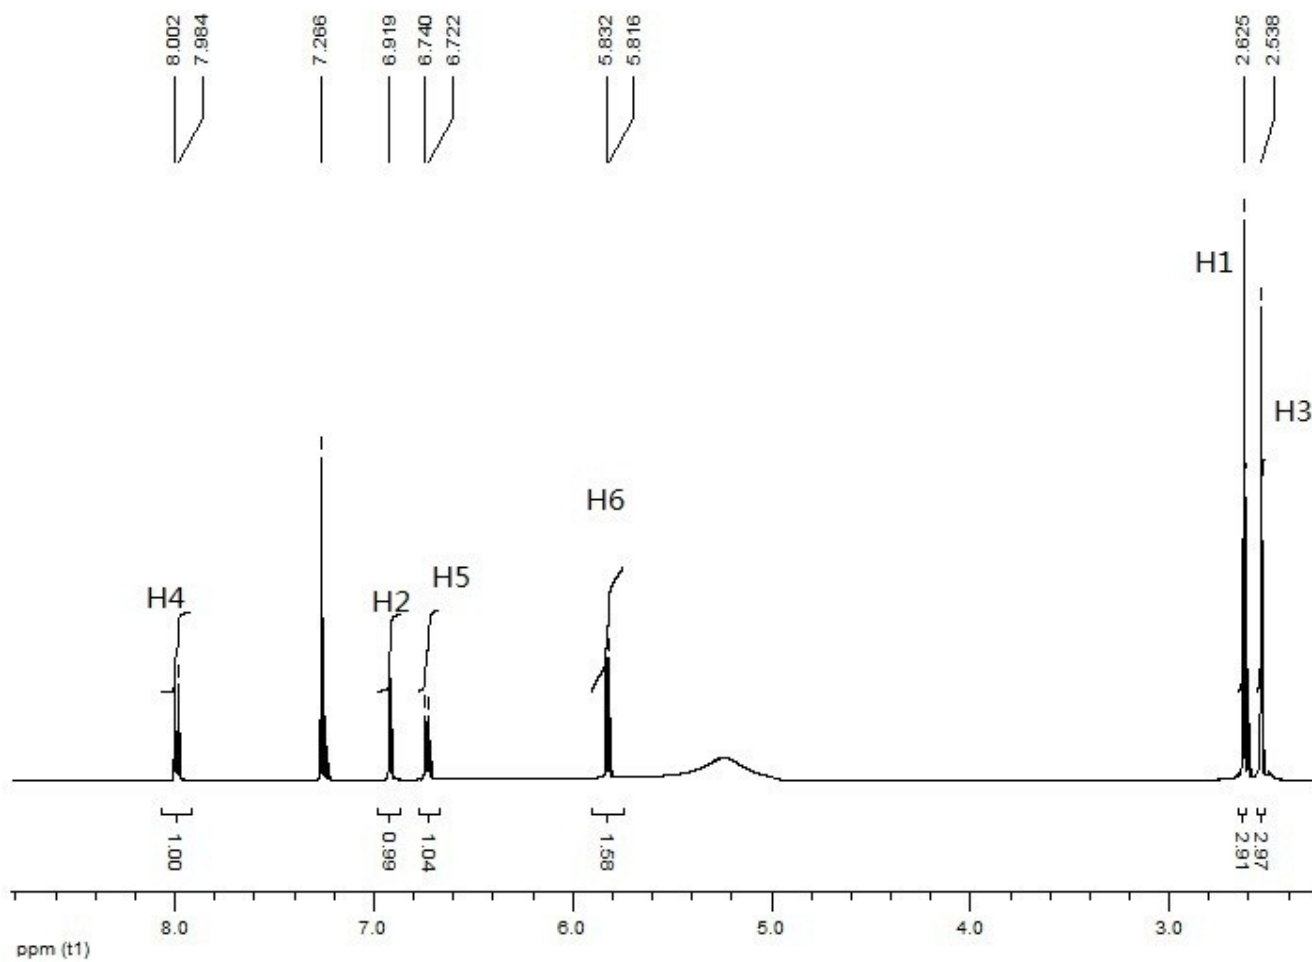



11. Figure S10  $^1\text{H-NMR}$  spectra of 2.

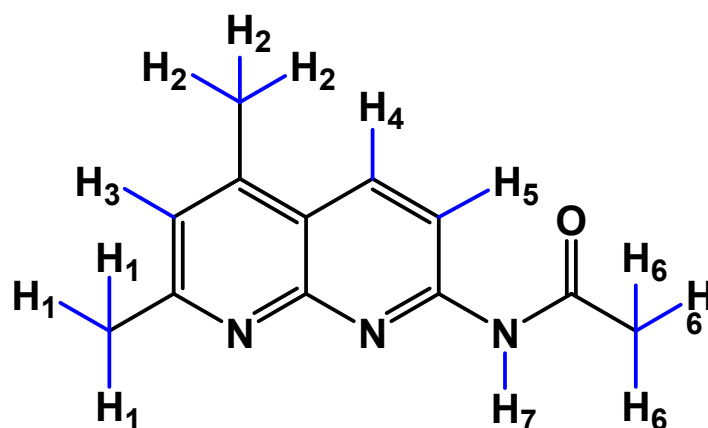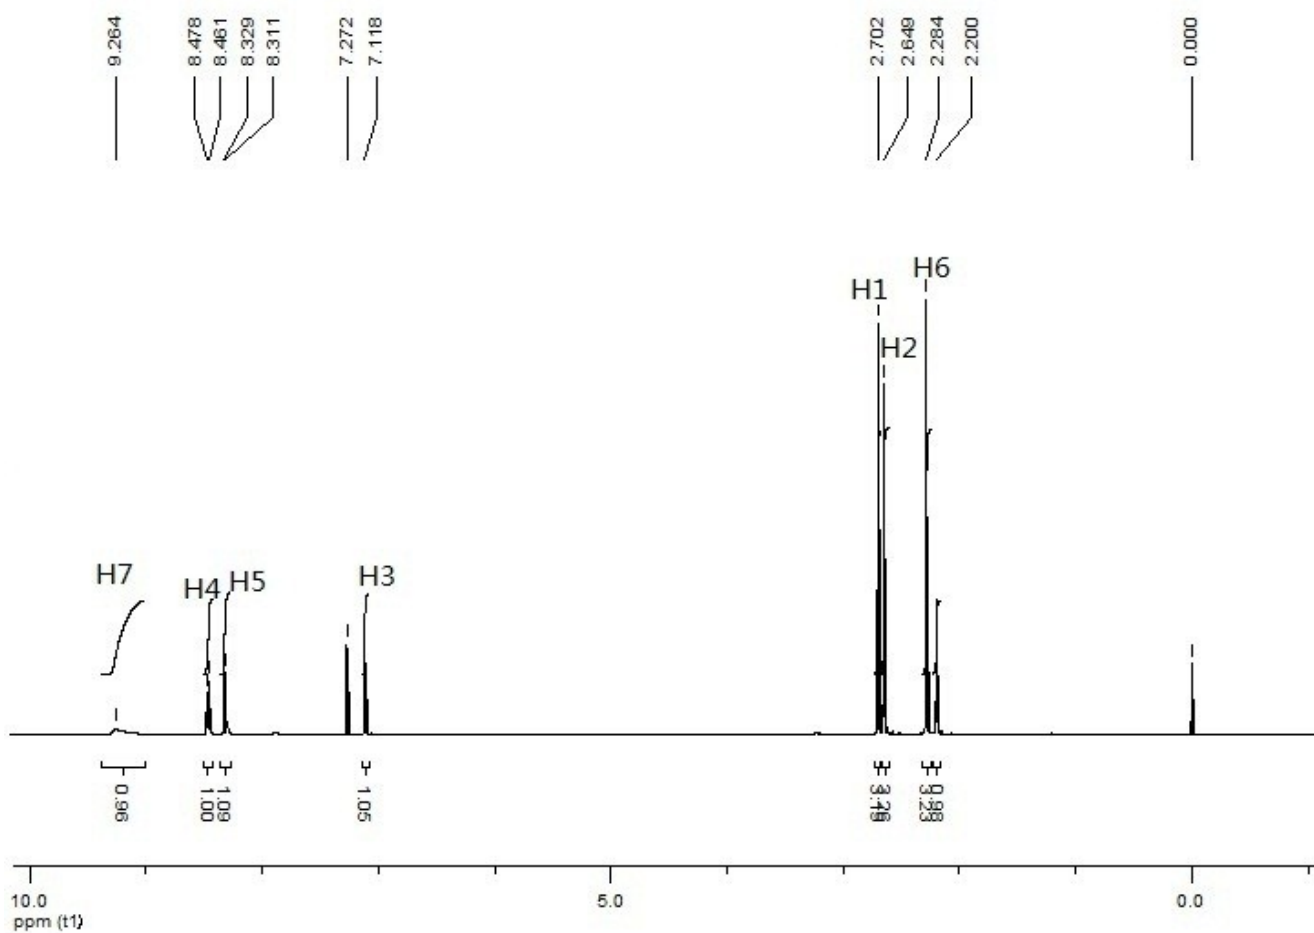

## 12. Figure S11 <sup>1</sup>H-NMR spectra of NAPHY.

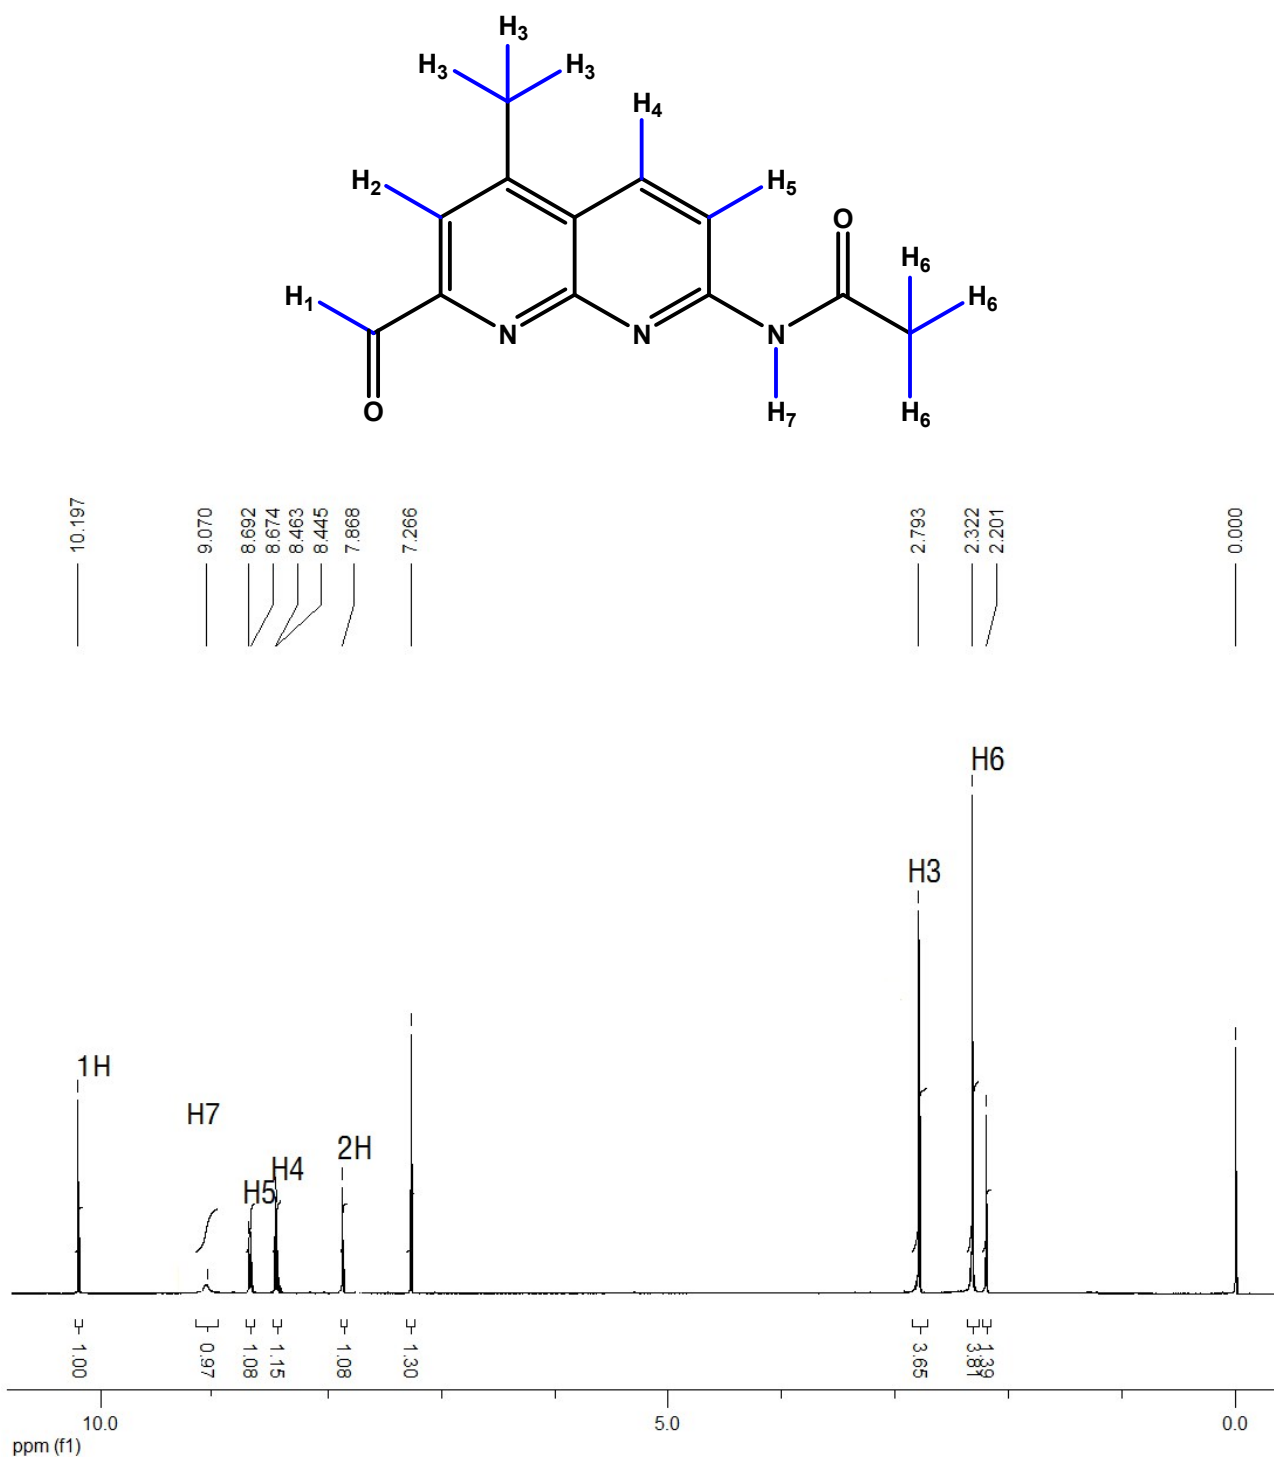

Figure S12 MS spectra of DP1.

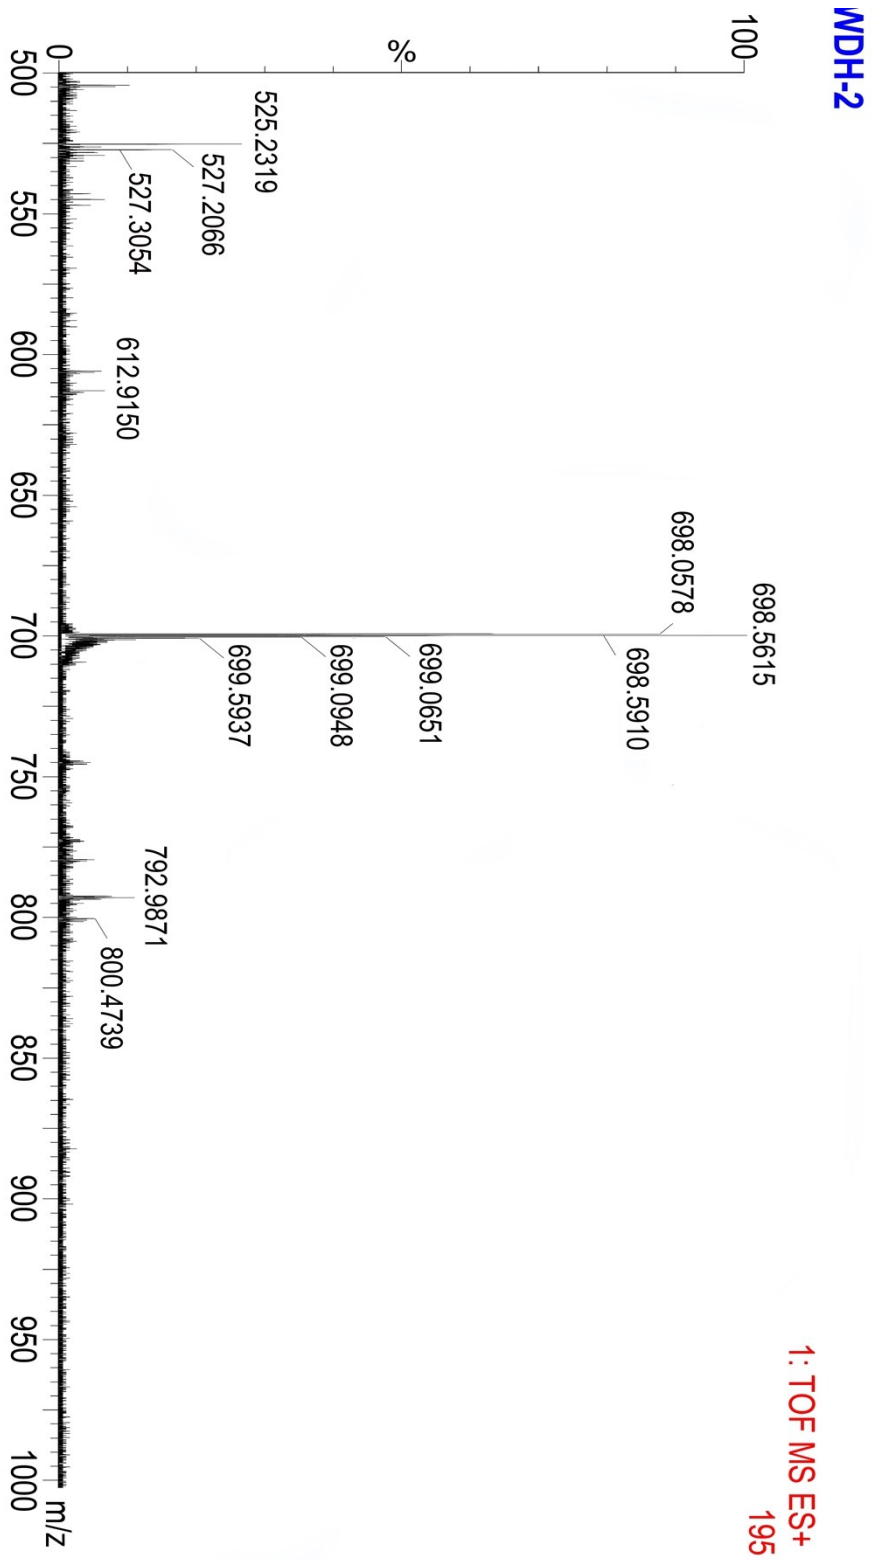

Figure S13 MS spectra of DP2.

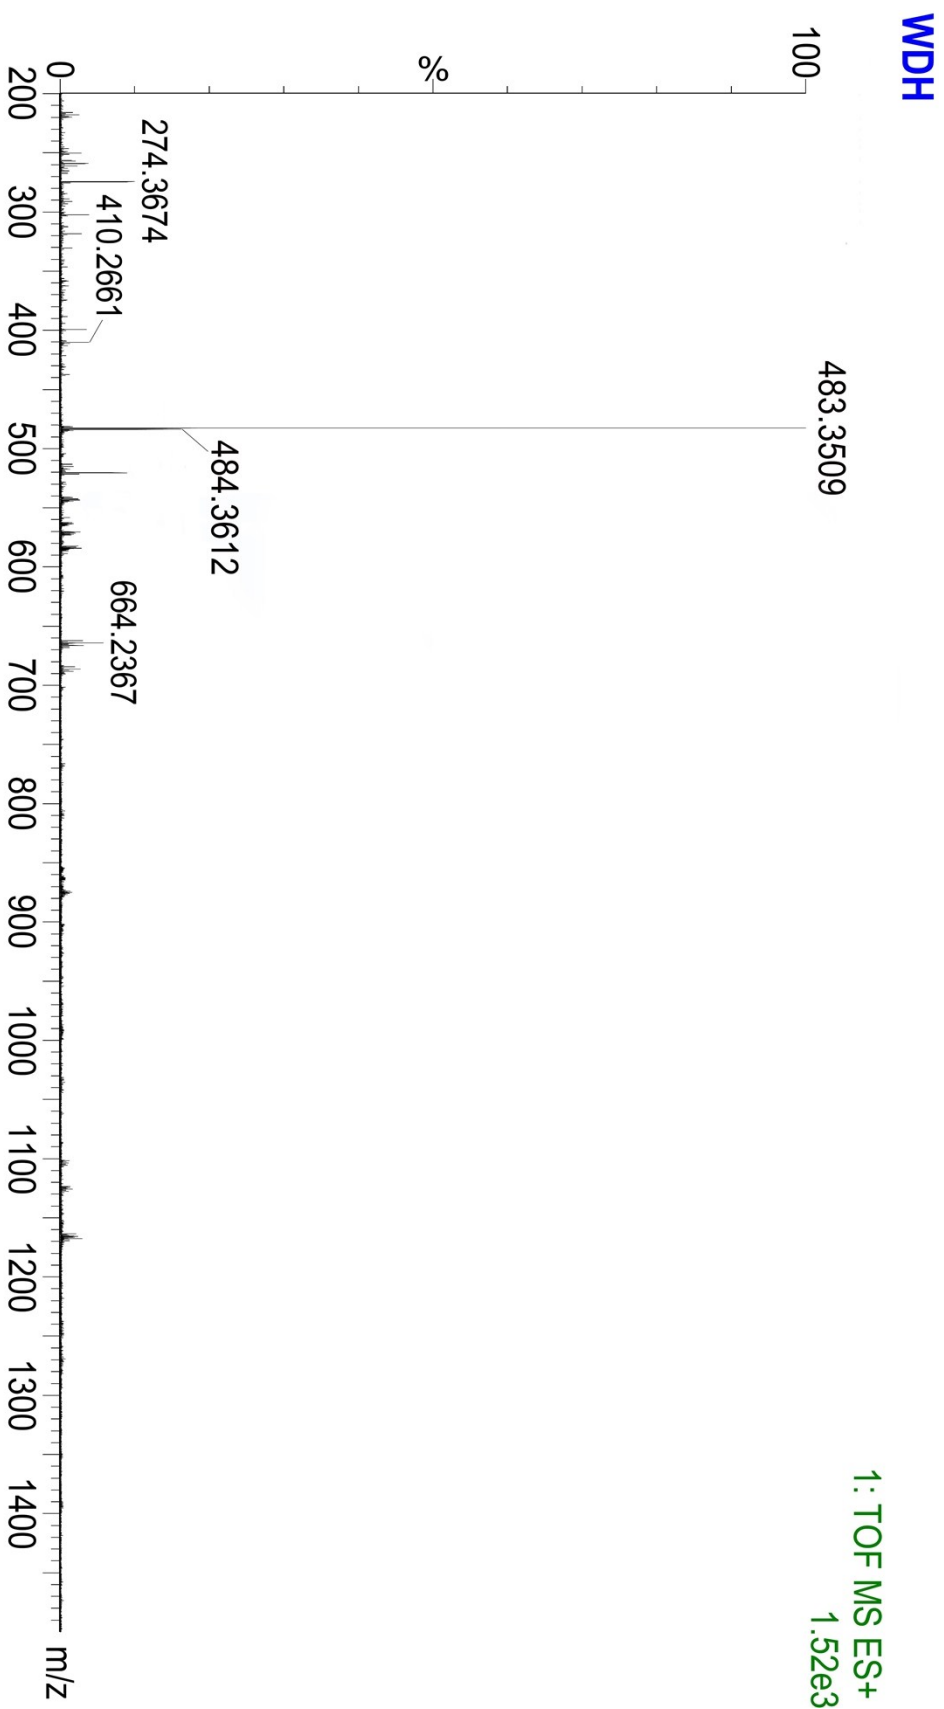

**Figure S14** Calculations for detection limit of **DP1** with  $Zn^{2+}$

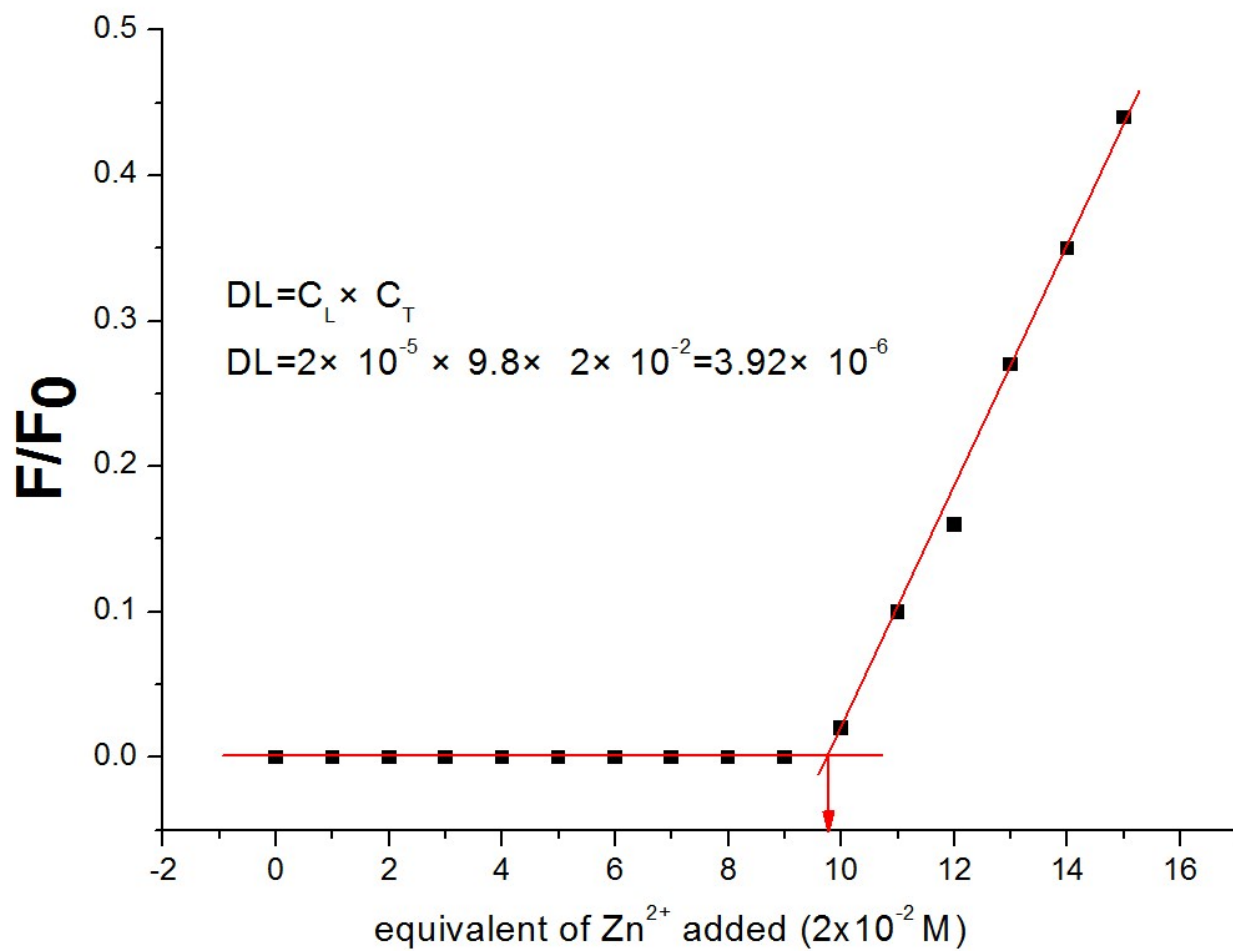

**Figure S15** UV-Vis spectral data of **DP2**

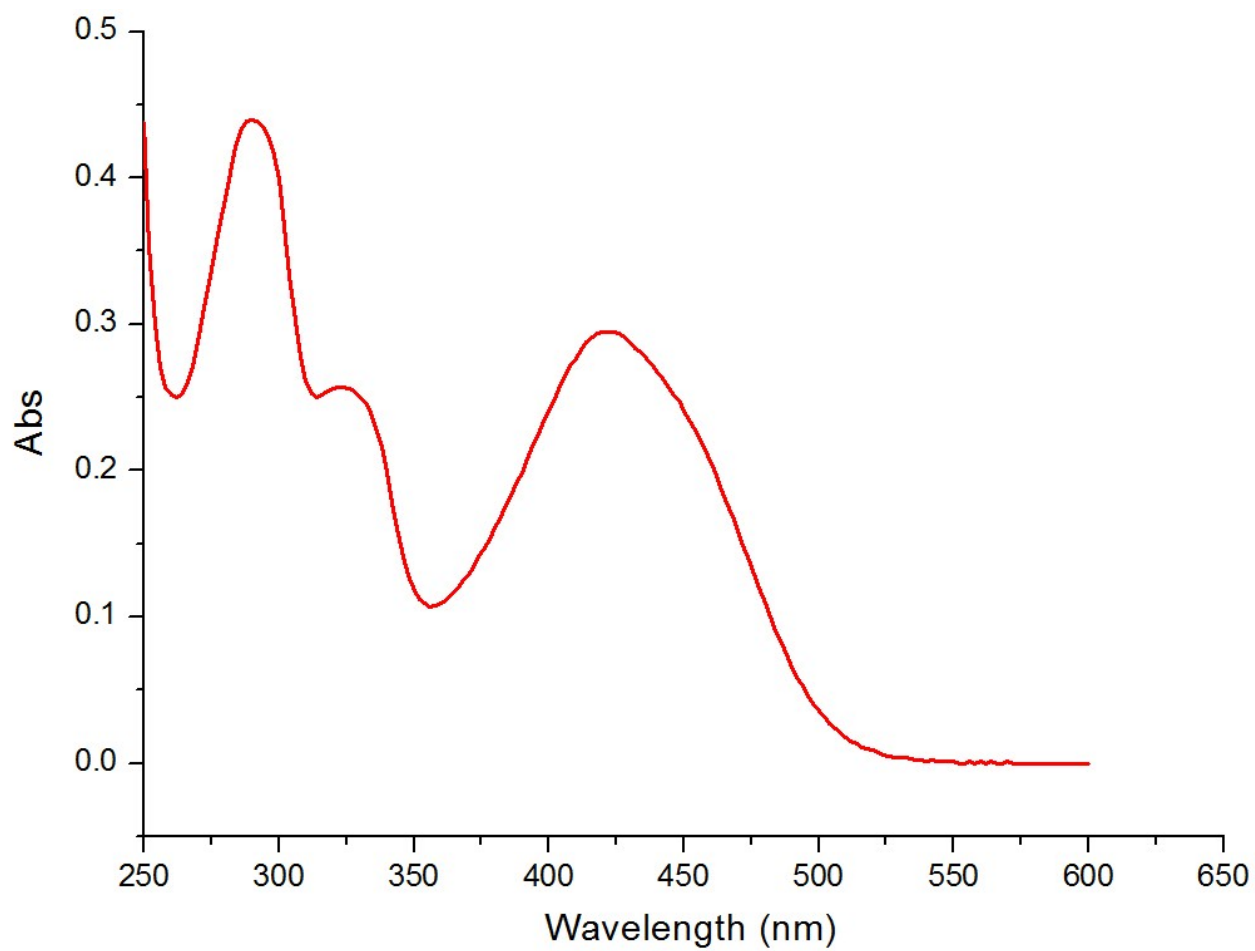

Supplement: c5ra08513f1.pdf [file c5ra08513f1.pdf]
